# Supplementary material
Source: PubMed Central journal article supplement (PMC4167293)
Supplement: mmc1.pdf [file mmc1.pdf]

## Identification of Electric-Field-Dependent Steps in the Na<sup>+</sup>,K<sup>+</sup>-Pump Cycle

Laura J. Mares,<sup>1</sup> Alvaro Garcia,<sup>2,6</sup> Helge H. Rasmussen,<sup>2,6</sup> Flemming Cornelius,<sup>3</sup> Yasser A. Mahmmoud,<sup>3</sup> Joshua R. Berlin,<sup>4</sup> Bogdan Lev,<sup>5</sup> Toby W. Allen,<sup>5</sup> and Ronald J. Clarke<sup>1,\*</sup>

<sup>1</sup>School of Chemistry, University of Sydney, Sydney, Australia ;<sup>2</sup>Department of Cardiology, Royal North Shore Hospital, Sydney, Australia; <sup>3</sup>Department of Biomedicine, University of Aarhus, Aarhus, Denmark; <sup>4</sup>Department of Pharmacology and Physiology, University of Medicine & Dentistry of New Jersey, New Jersey Medical School, Newark, New Jersey; <sup>5</sup>School of Applied Science, Royal Melbourne Institute of Technology University, Melbourne, Australia; and <sup>6</sup>Kolling Institute, University of Sydney, Sydney, Australia

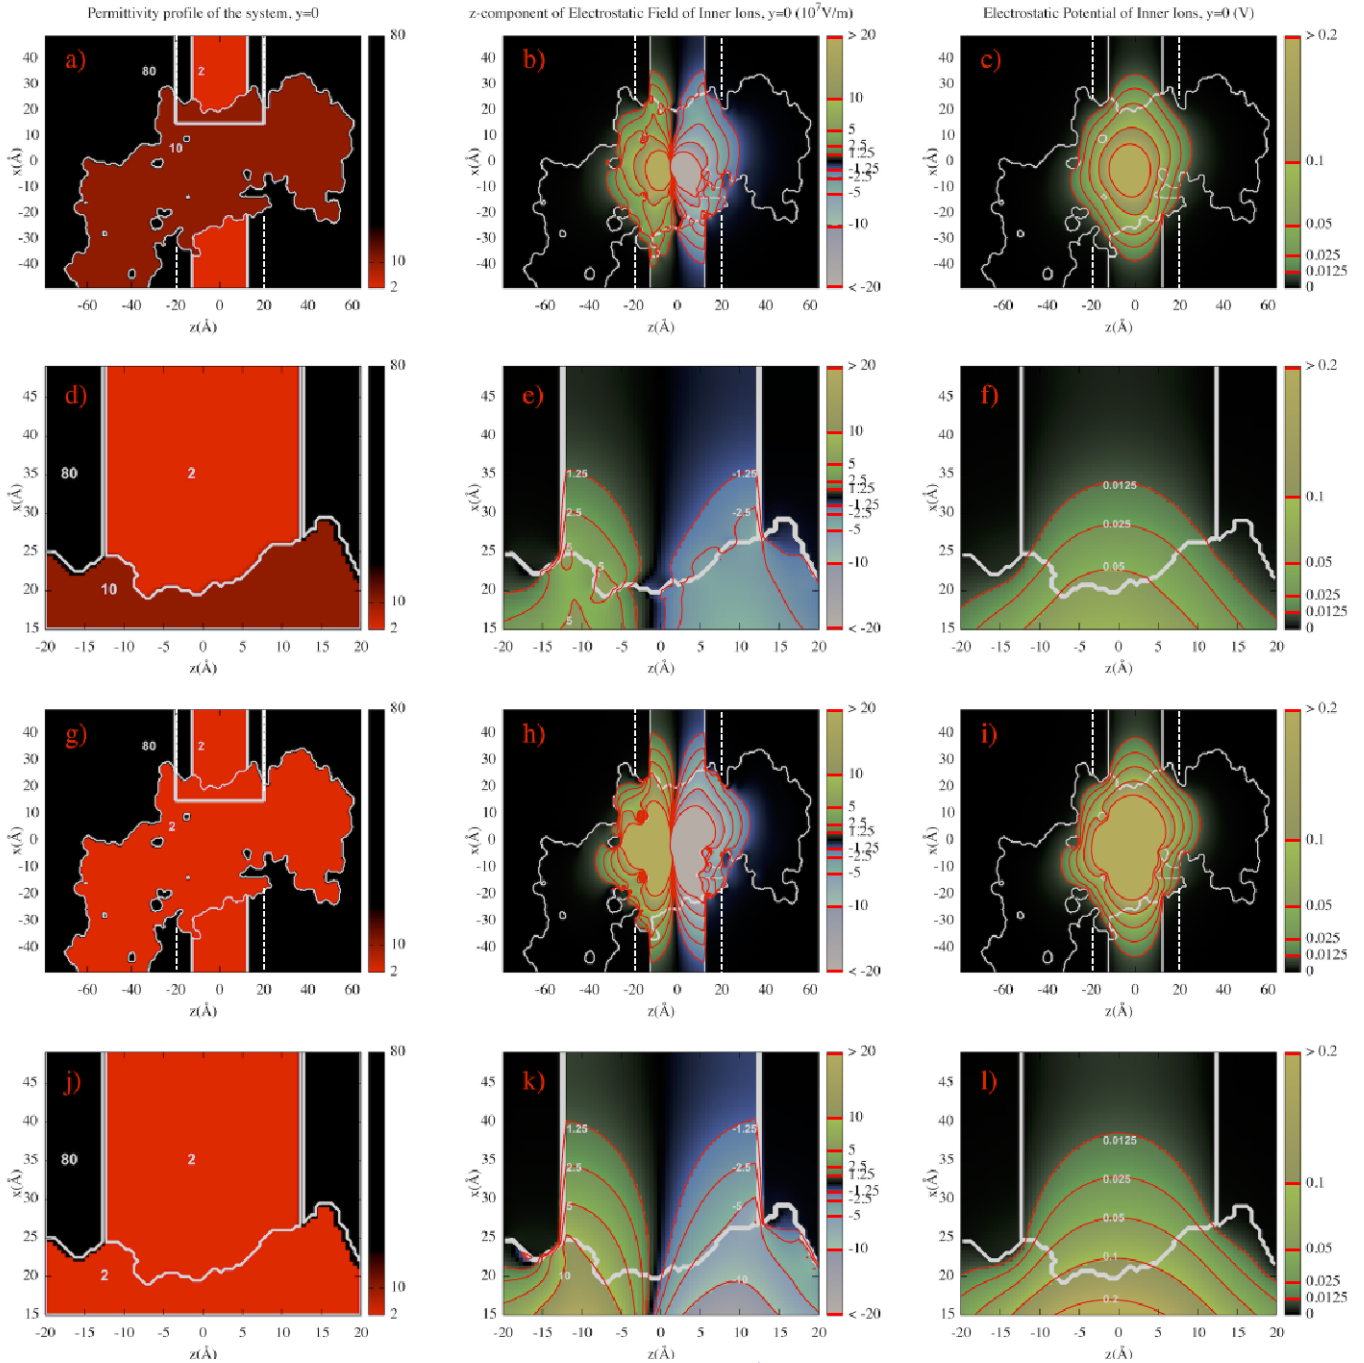

**Figure S1.** Electrostatics due to the binding of 2  $K^+$  ions to the for the 2ZX structure. Projections (in the plane,  $y=0$ ) of the dielectric constant (relative permittivity), electric field and electrostatic potential are shown in the first, second and third columns, respectively. Panels a, b and c show values computed for  $\epsilon_p = 10$ , while panels g, h and i show results for  $\epsilon_p = 2$ . Rows 2 and 4 are zoomed views of rows 1 and 3, respectively. Contours are not evenly spaced but correspond to the tick marks on the right hand colour bars. Values for the electric field are limited to the range  $-20:20 \text{ } 10^7 \text{ V/m}$ , with lower values lower shown as  $-20$  and higher values as  $20$ . Values for the electrostatic potential are truncated to  $200\text{mV}$ , with higher values shown as  $0.2\text{V}$ .

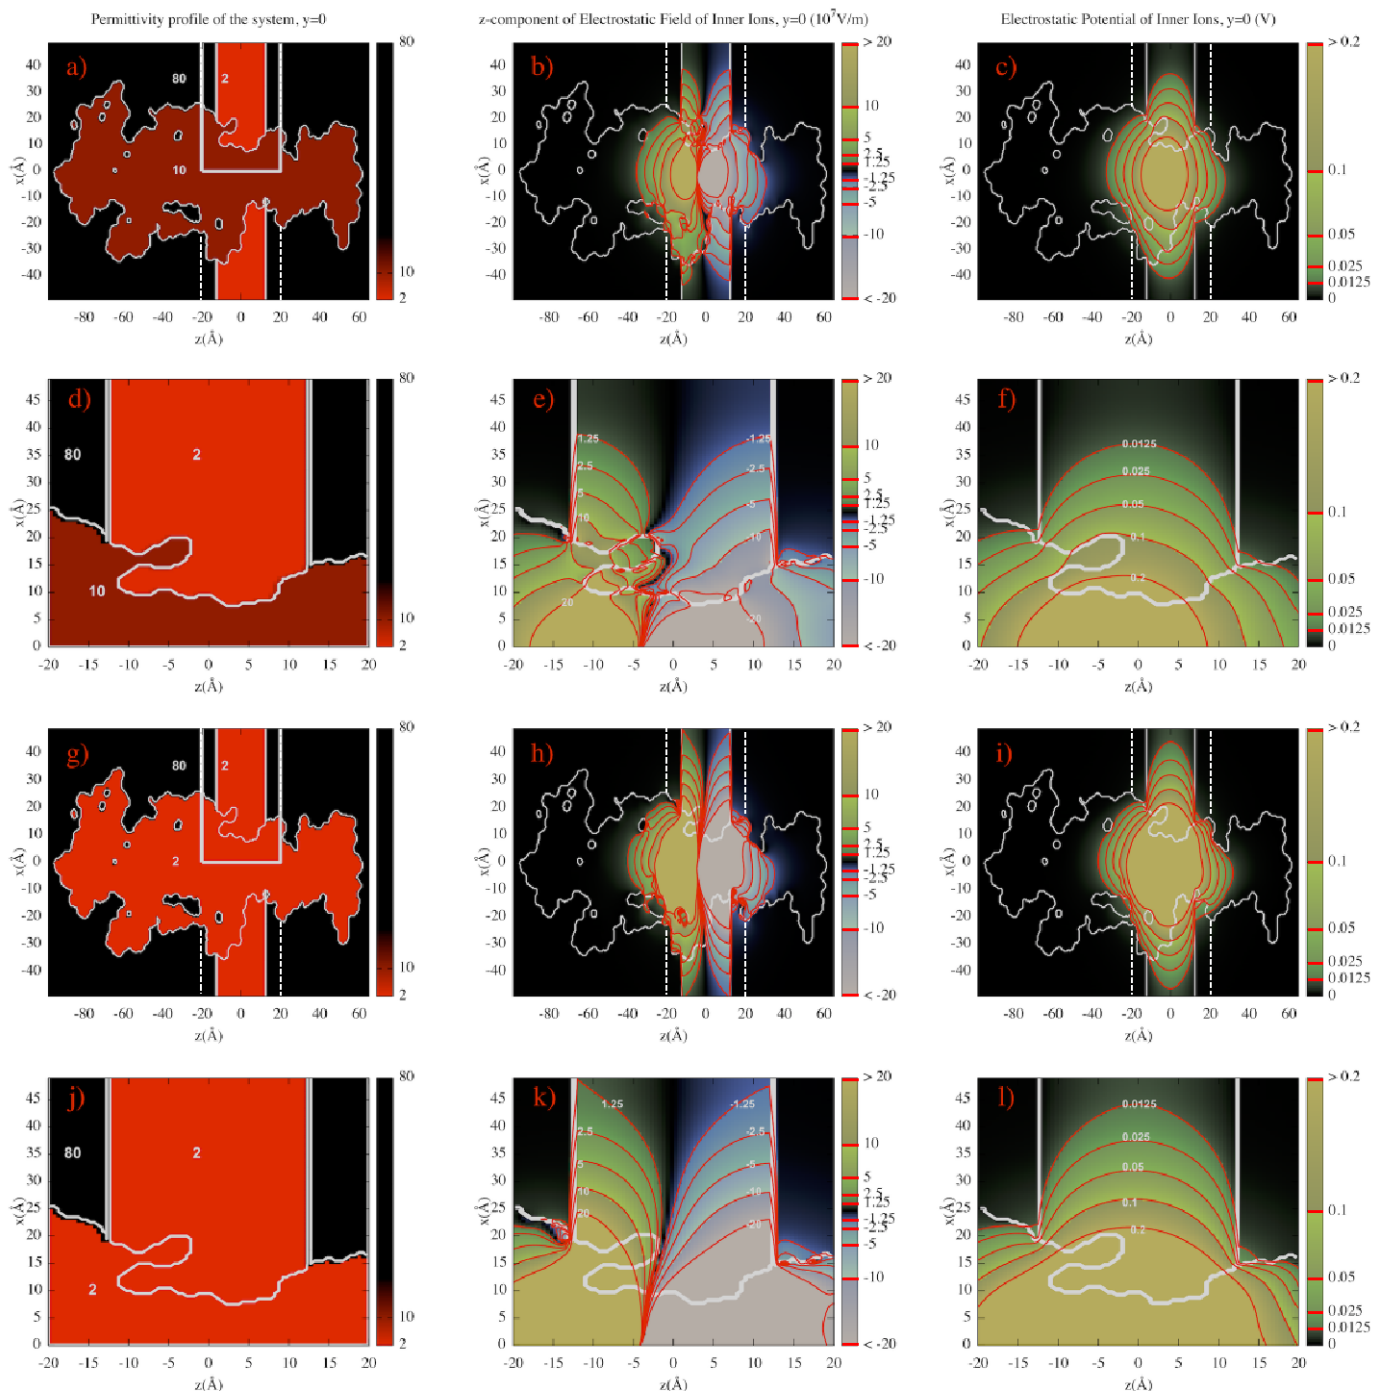

**Figure S2.** Electrostatics due to the binding of 3  $\text{Na}^+$  ions to the for the 3WGU structure, with details as in Fig.S1.

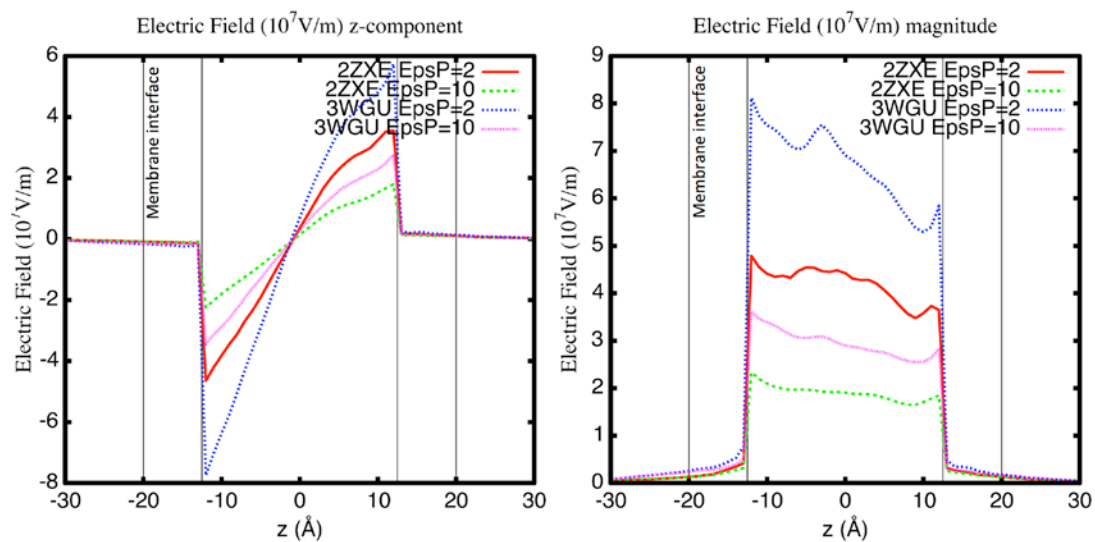

**Figure S3.** Average value of the electric field across the membrane outside the protein. Results are shown for the  $z$ -component (left) and the magnitude of electric field (right) as a function of  $z$ . The two curves per system correspond to the two different values of  $\epsilon_p$  (EpsP) used. Vertical lines indicate the boundaries of the membrane interfacial region.
